# Supplementary material for: Development of an In-House EphA2 ELISA for Human Serum and Measurement of Circulating Levels of EphA2 in Hypertensive Patients with Renal Dysfunction
Source: MDPI journal article supplement (doi:10.3390/diagnostics12123023), 2022-12-02
Supplement: s1 [file s1]

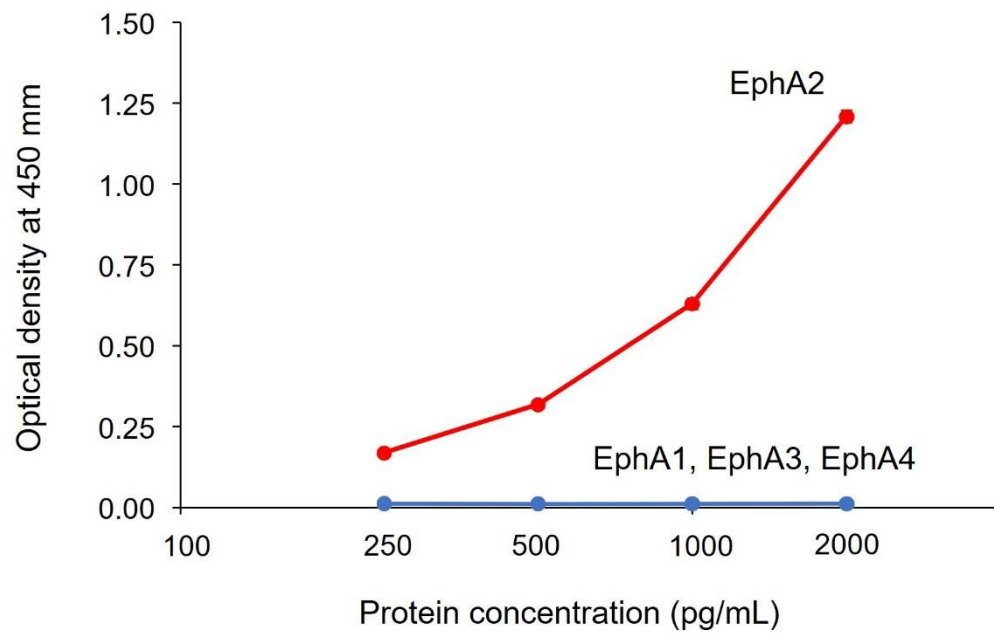

**Figure S1.** Specificity for EphA2. No cross-reactivity was noted with other Eph receptors (i.e., EphA1, EphA3, and EphA4).

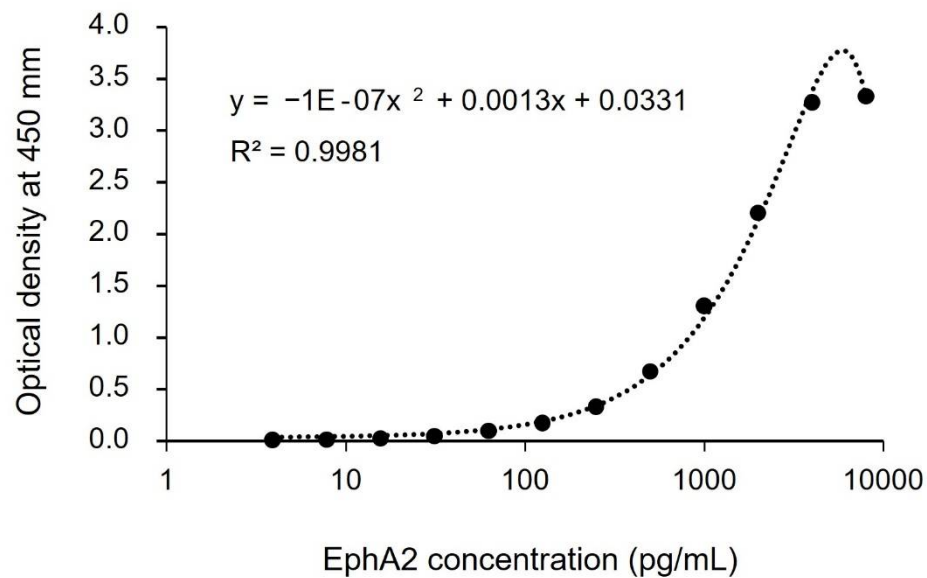

**Figure S2.** Calibration curve of EphA2 using a second-degree polynomial. A typical calibration curve is depicted across the concentration range (3.9–4000 pg/mL). The hook effect was observed at an EphA2 concentration of 8000 pg/mL.

**Table S1.** Spike and recovery test.

| Serum Level        | EphA2 | Spike Level        |                       |                      | Average % Recovery |
|--------------------|-------|--------------------|-----------------------|----------------------|--------------------|
|                    |       | Low<br>(200 pg/mL) | Medium<br>(600 pg/mL) | High<br>(1800 pg/mL) |                    |
| High ( $n = 2$ )   |       | 79                 | 81                    | 80                   | 80                 |
| Medium ( $n = 2$ ) |       | 79                 | 81                    | 86                   | 82                 |
| Low ( $n = 2$ )    |       | 87                 | 97                    | 111                  | 98                 |
| Average % recovery |       | 82                 | 86                    | 92                   | 87                 |

EphA2 level: high (1500–4000 pg/mL), medium (500–1500 pg/mL), and low (<500 pg/mL).

**Table S2.** Dilution linearity test.

| Serum Level           | EphA2 | Dilution Factor (-Fold) |     |     |     | Average % Recovery |
|-----------------------|-------|-------------------------|-----|-----|-----|--------------------|
|                       |       | 2                       | 4   | 8   | 16  |                    |
| Very high ( $n = 4$ ) |       | 101                     | 97  | 103 | 103 | 101                |
| High ( $n = 4$ )      |       | 85                      | 91  | 101 | 101 | 94                 |
| Medium ( $n = 4$ )    |       | 89                      | 93  | 99  | 108 | 97                 |
| Low ( $n = 4$ )       |       | 117                     | 119 | 132 | NA  | 123                |
| Average % recovery    |       | 98                      | 100 | 109 | 104 | 103                |

Serum EphA2 level: very high (2000–4000 pg/mL), high (1000–2000 pg/mL), medium (500–1000 pg/mL), low (<500 pg/mL).

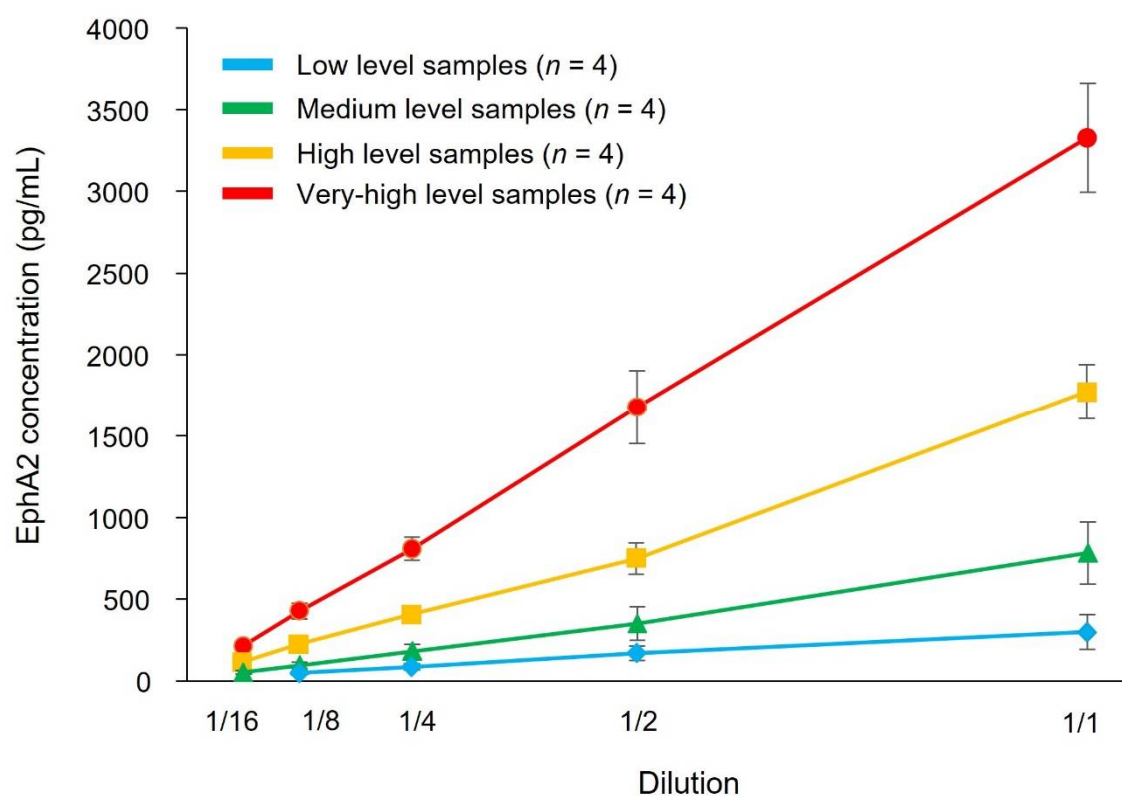

**Figure S3.** Linearity. Dilution linearity of EphA2 was assessed with two-, four-, eight- and 16-fold dilutions. The quantitation of EphA2 at all tested dilutions was accurate and precise.

**Table S3.** Precision test.

| Serum EphA2 level         | Intra-assay CV (%) | Inter-assay CV (%) |
|---------------------------|--------------------|--------------------|
| Very high ( <i>n</i> = 4) | 2.0                | 1.7                |
| High ( <i>n</i> = 4)      | 2.9                | 3.0                |
| Medium ( <i>n</i> = 4)    | 2.8                | 2.5                |
| Low ( <i>n</i> = 4)       | 3.3                | 6.7                |
| Average                   | 2.8                | 3.5                |

Serum EphA2 level: very high (2000–4000 pg/mL), high (1000–2000 pg/mL), medium (500–1000 pg/mL), and low (<500 pg/mL).

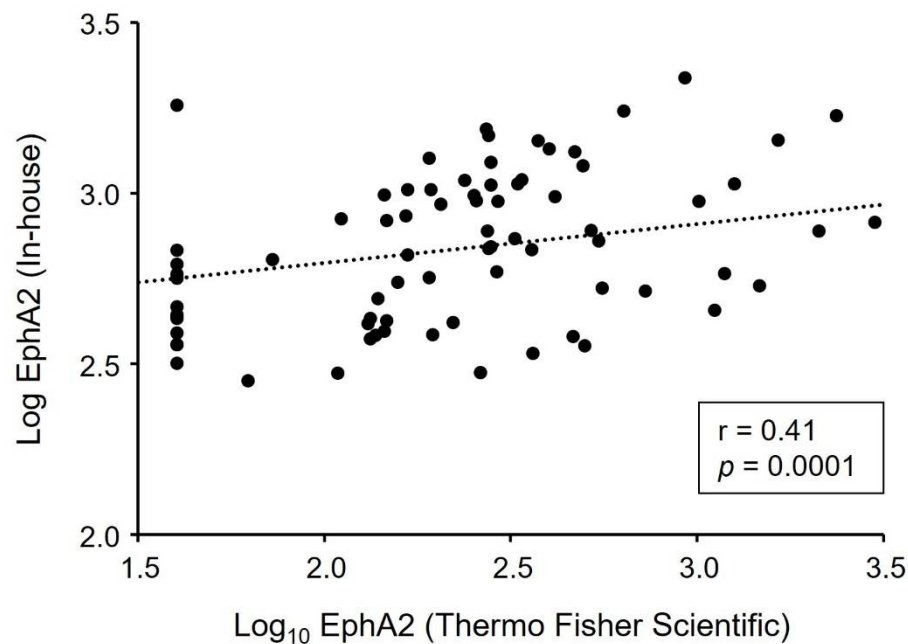

**Figure S4.** The correlation of EphA2 results between the assays performed with the in-house ELISA and ELISA kit from Thermo Fisher Scientific. The concentrations of EphA2 measured with the novel in-house ELISA correlated significantly but poorly with the EphA2 concentrations measured with the ELISA from ThermoFisher Scientific.

**Table S4.** Comparison of novel in-house EphA2 ELISA with a Thermo Fisher Scientific ELISA in the study patients.

|                                | In-house        | Thermo Fisher Scientific |
|--------------------------------|-----------------|--------------------------|
| Analytical sensitivity (pg/mL) | 29.5            | 80 <sup>a</sup>          |
| Assay range (pg/mL)            | 31.3–2000       | 82–20,000 <sup>a</sup>   |
| Intra-assay CV (%)             | 2.8             | <10 <sup>a</sup>         |
| Inter-assay CV (%)             | 3.5             | <12 <sup>a</sup>         |
| Detectability (%)              | 100.0           | 83.8                     |
| EphA2 (pg/mL)                  | 682 (434, 1006) | 252 (131, 464)           |

<sup>a</sup> Data from the ThermoFisher Scientific product information sheet.
